# Supplementary material
Source: PubMed Central journal article supplement (PMC7301572)
Supplement: ao0c00926_si_001.pdf [file ao0c00926_si_001.pdf]

## Supporting Information

### Glutathione Surface Molecularly Imprinted Polymer from CLX1180 via Three Modes Polymerization for Selective Adsorption of Glutathione

Jun Zhang<sup>†‡§</sup>, Meng Wang<sup>†‡§</sup>, Wenli Peng<sup>†‡</sup>, Zhengcan Chen<sup>†‡</sup> and Zhenbin Chen<sup>†‡\*</sup>

<sup>†</sup>State Key Laboratory of Advanced Processing and Recycling of Nonferrous Metals, Lanzhou University of Technology, Lanzhou 730050, Gansu, China

<sup>‡</sup>School of Materials Science and Engineering, Lanzhou University of Technology, Lanzhou 730050, Gansu, China.

**Figure S1.** FTIR spectra of (a) LX1180; (b) CLX1180.

**Table S1.** The TOF analysis of GSH-SMIP.

**Figure S2.** The polymerism of NMBA under the different condition (The test tube numbers were corresponding Table S2 terms).

**Figure S3.** The phenomenon of polymerism under GSH, CLX1180 and NMBA at Nitrogen atmosphere and standing for 24 h at 4 °C and (a) not added tempo; (b) added tempo.

**Figure S4.** The relationship of adsorption capacity (q) and adsorption time (t) of GSH-MIP.

**Figure S5.** The effect of initial GSH concentration on the adsorption capacity of GSH-MIP.

**Figure S6.** Retention time of (a) GSH and (b) L-cy; (c) Standard curves of the relationship between peak area and concentration of GSH and L-cy.

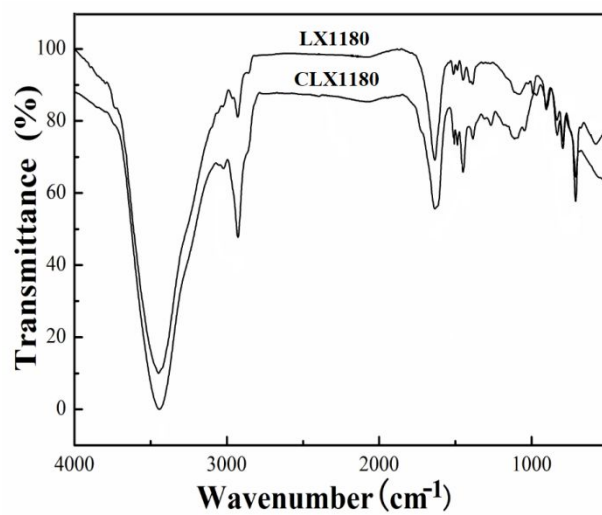

**Figure S1.** FTIR spectra of (a) LX1180; (b) CLX1180.

**Table S1.** The TOF analysis of GSH-SMIP.

RT: 0.00 - 44.02 SM: 7G

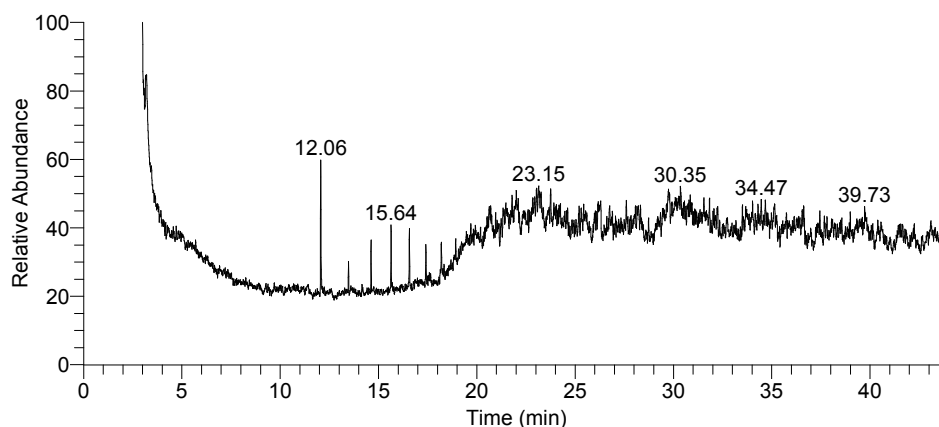

NL:  
7.70E5  
TIC F: MS  
ding150601  
-01

### Compound Structure

### Delta

### Hit Spectrum

3-Isopropoxy alanine

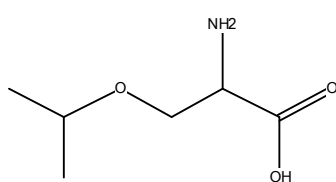

Raw data - Library entry

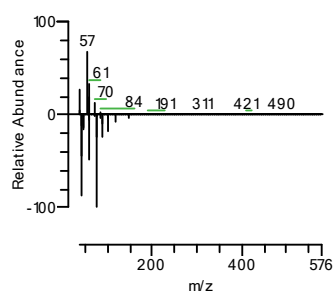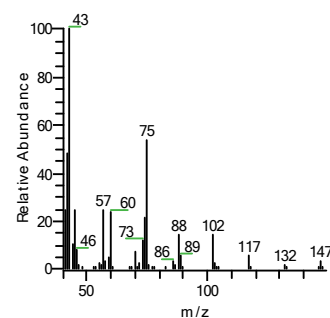

2-Butanone, 4-hydroxy-

2-Butanone, 4-hydroxy-

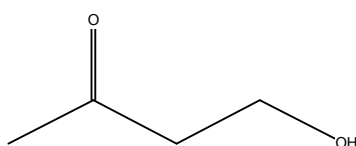

Raw data - Library entry

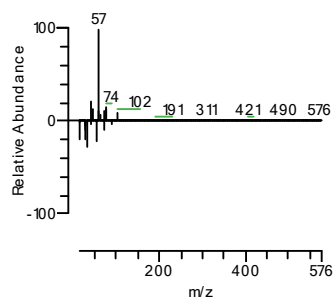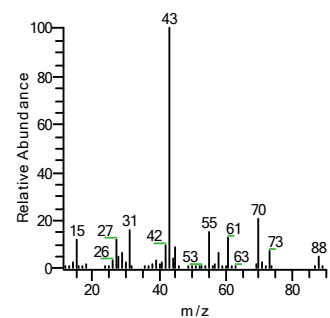

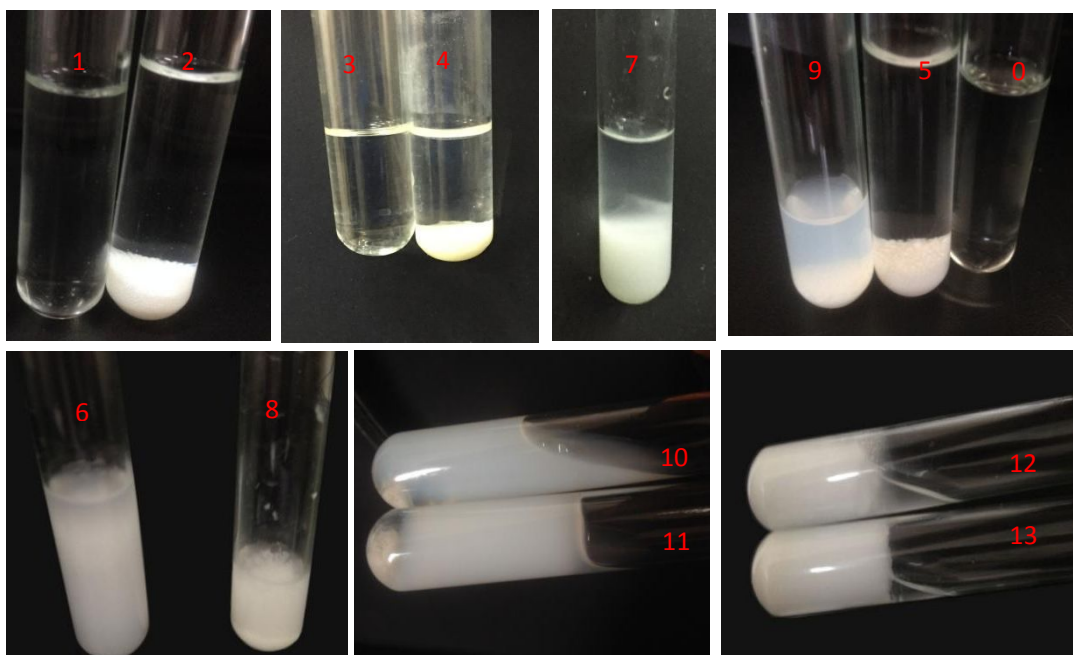

**Figure S2.** The polymerism of NMBA under the different condition (The test tube numbers were corresponding **Table S2** terms).

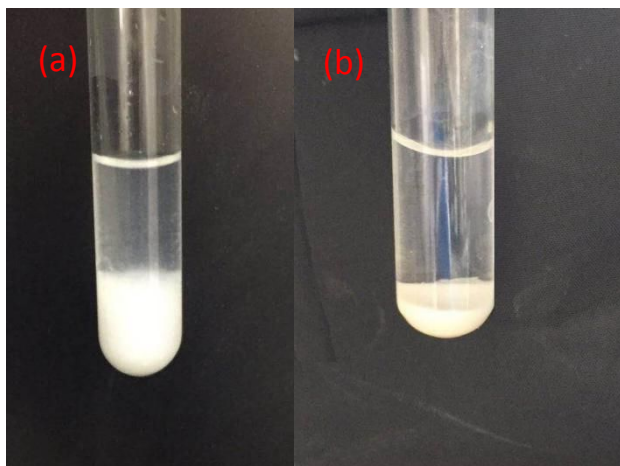

**Figure S3.** The phenomenon of polymerism under GSH, CLX1180 and NMBA at Nitrogen atmosphere and standing for 24 h at 4 °C and (a) not added TEMPO; (b) added TEMPO.

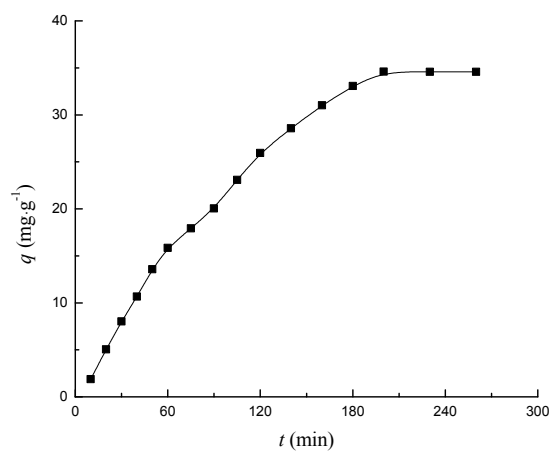

**Figure S4.** The relationship of adsorption capacity ( $q$ ) and adsorption time ( $t$ ).

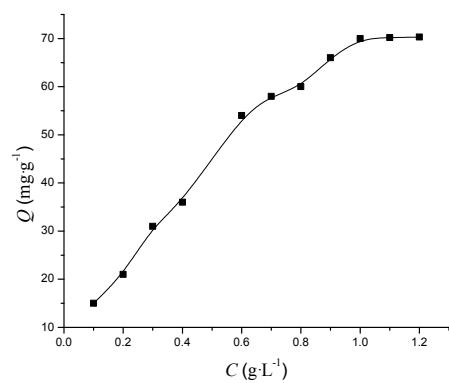

**Figure S5.** The effect of initial GSH concentration on the adsorption capacity of GSH-MIP.

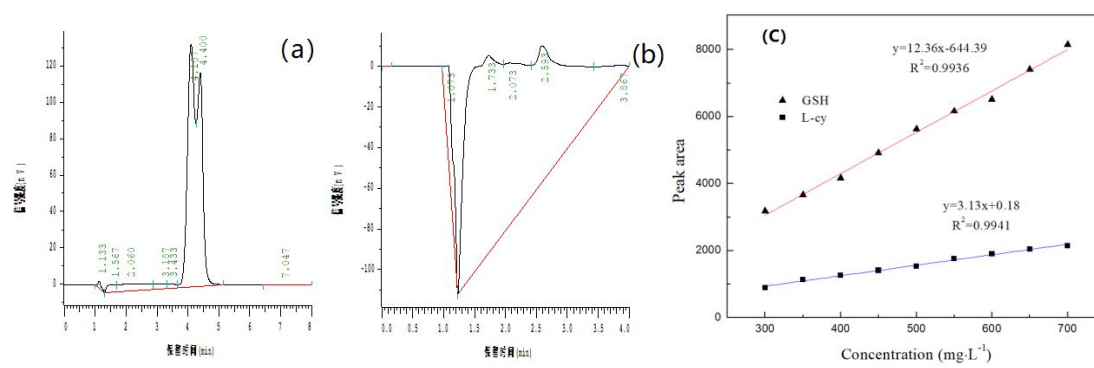

**Figure S6.** Retention time of (a) GSH and (b) L-cy; (c) Standard curves of the relationship between peak area and concentration of GSH and L-cy.
